# Supplementary figures and images for: Preparation and Performance Characterization of a new dust suppressant with a cross-linked network structure for use in open-pit coal mines
Source: Research Square preprint supplement (doi:10.21203/rs.3.rs-335111/v1), 2021-03-23

**Graphical Abstracts**


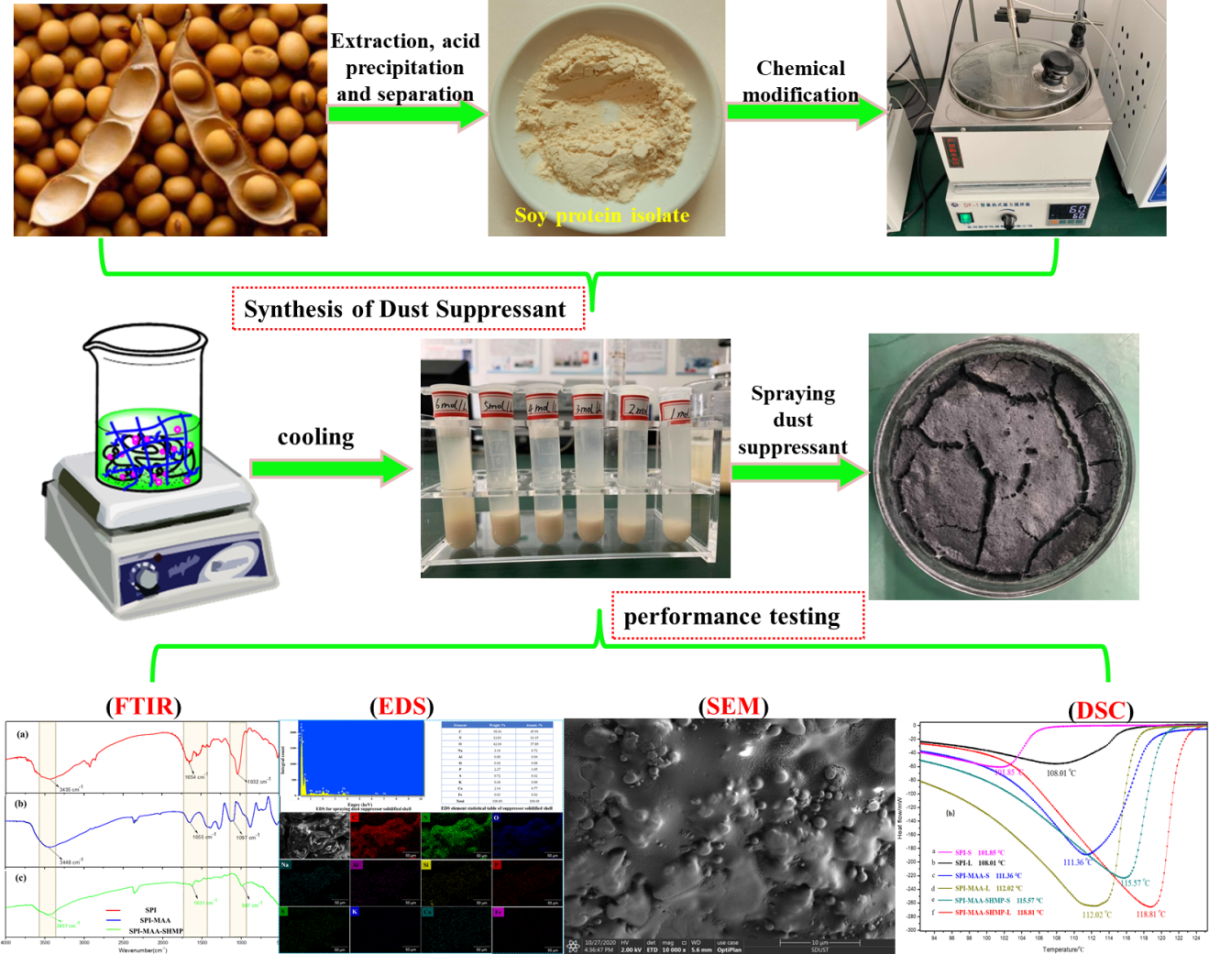

Supplement: Supplementary file 1 [file 7ab931ea83f3191d59142932.docx]
